# Supplementary material
Source: HighWire-hosted journal article supplement (https://qualitysafety.bmj.com/highwire/filestream/161474/field_highwire_adjunct_files/2/bmjqs-2021-013864supp003_data_supplement.pdf)
Supplement: bmjqs-2021-013864supp003_data_supplement.pdf [file bmjqs-2021-013864supp003_data_supplement.pdf]

*Expert evaluation with regard to mortality relevance of derived and implemented measures*

| <b>A3.1.1.3.2 Derivation of measure with unchanged and modified consideration?</b>                                                                                                                                                                                                                  | <b>The derived measure is relevant for the mortality of patients with ventilation &gt;24h:</b><br><br>1= almost surely relevant<br>2= likely relevant<br>3= likely irrelevant<br>4= almost surely irrelevant<br>NA=No information/ Don't know |           |           |           |               |
|-----------------------------------------------------------------------------------------------------------------------------------------------------------------------------------------------------------------------------------------------------------------------------------------------------|-----------------------------------------------------------------------------------------------------------------------------------------------------------------------------------------------------------------------------------------------|-----------|-----------|-----------|---------------|
|                                                                                                                                                                                                                                                                                                     | <b>R1</b>                                                                                                                                                                                                                                     | <b>R2</b> | <b>R3</b> | <b>R4</b> | <b>Median</b> |
| Documentation sheet for treatment in the emergency department created                                                                                                                                                                                                                               | 4                                                                                                                                                                                                                                             | 3         | 3         | 4         | 3,5           |
| The paging service has been expanded in terms of nursing care                                                                                                                                                                                                                                       | 3                                                                                                                                                                                                                                             | 2         | 2         | 4         | 2,5           |
| Ventilation protocol has been modified.                                                                                                                                                                                                                                                             | 1                                                                                                                                                                                                                                             | 2         | 2         | 2         | 2             |
| A column with daily goals was added to the intensive care curve.                                                                                                                                                                                                                                    | 3                                                                                                                                                                                                                                             | 3         | 3         | 3         | 3             |
| delirium screening introduced                                                                                                                                                                                                                                                                       | 3                                                                                                                                                                                                                                             | 4         | 4         | 2         | 3,5           |
| The therapy limitation sheet is used consistently.                                                                                                                                                                                                                                                  | 4                                                                                                                                                                                                                                             | 4         | 4         | 1         | 4             |
| Medical qualification was continued                                                                                                                                                                                                                                                                 | 1                                                                                                                                                                                                                                             | 2         | 3         | 4         | 2,5           |
| obligatory visit plan                                                                                                                                                                                                                                                                               | 4                                                                                                                                                                                                                                             | 4         | 4         | 4         | 4             |
| Documentation in the admitting situation. Chief medical director of the emergency department. Triage system. Training of the emergency department staff                                                                                                                                             | 3                                                                                                                                                                                                                                             | 4         | 4         | 3         | 3,5           |
| <i>general**</i> Update of the SOPs*                                                                                                                                                                                                                                                                | 3                                                                                                                                                                                                                                             | 4         | 4         | 3         | 3,5           |
| Resuscitation protocol                                                                                                                                                                                                                                                                              | 2                                                                                                                                                                                                                                             | 3         | 2         | 2         | 2             |
| Updating of the SOP's* with regard to ventilation                                                                                                                                                                                                                                                   | 2                                                                                                                                                                                                                                             | 3         | 2         | 2         | 2             |
| no clinical microbiologist available yet, but improved dialogue with the microbiological laboratory. E-learning module 'Antibiotic therapy' mandatory for all medical staff Antibiotic guidelines on the intranet                                                                                   | 3                                                                                                                                                                                                                                             | 3         | 2         | 3         | 3             |
| patient positioning protocols                                                                                                                                                                                                                                                                       | 2                                                                                                                                                                                                                                             | 2         | 3         | 3         | 2,5           |
| "Urgent legal guardianship procedures" were administratively optimised                                                                                                                                                                                                                              | 4                                                                                                                                                                                                                                             | 4         | 4         | 4         | 4             |
| Videolaryngoscope is purchased                                                                                                                                                                                                                                                                      | 3                                                                                                                                                                                                                                             | 4         | 4         | 3         | 3,5           |
| Meetings for PDMS* have taken place, Chief Medical Officer member of PDMS* managing group, but then roll-off by the hospital owner                                                                                                                                                                  | 4                                                                                                                                                                                                                                             | 4         | 4         | 4         | 4             |
| ABS* further training with the aim of achieving ABS Expert certificate, building up the ABS team, 1 infectiological visit to IMC and intensive care unit per week. Reason for delayed full implementation: Maximum of only 1 ABS course per year possible (standardized advanced course completed). | 1                                                                                                                                                                                                                                             | 2         | 3         | 2         | 2             |
| Introduction of PDMS* in internal intensive care units.                                                                                                                                                                                                                                             | 3                                                                                                                                                                                                                                             | 4         | 4         | 4         | 4             |
| <i>Admission and transfer of intensive care unit patients:**</i> Created for neurosurgical and neurological patients.                                                                                                                                                                               | 3                                                                                                                                                                                                                                             | 4         | 4         | 4         | 4             |
| additional intensive care capacity.                                                                                                                                                                                                                                                                 | 3                                                                                                                                                                                                                                             | 4         | 4         | 4         | 4             |
| Electronic request of consults                                                                                                                                                                                                                                                                      | 2                                                                                                                                                                                                                                             | 4         | 3         | 4         | 3,5           |
| create a new ICU* curve with simplified documentation for rounds and establish a basic electronic recording of specialist rounds via HIS*                                                                                                                                                           | 4                                                                                                                                                                                                                                             | 4         | 4         | 4         | 4             |
| Combination therapy of suprarenin and nioadrenalin was replaced by nor/dobutamine and implemented in the standard perfusors of ICU                                                                                                                                                                  | 3                                                                                                                                                                                                                                             | 2         | 2         | 3         | 2,5           |

|                                                                                                                                                                                                                                                      |   |   |   |   |     |
|------------------------------------------------------------------------------------------------------------------------------------------------------------------------------------------------------------------------------------------------------|---|---|---|---|-----|
| has not developed its own resuscitation protocol, but has instead promoted the use of the anaesthesia protocol in resuscitation situations (reason for the deviation: anaesthesia protocol is detailed and daily. no additional form must be set up) | 3 | 2 | 2 | 4 | 2,5 |
| Immediate storage of the OP* protocols in the electronic patient record                                                                                                                                                                              | 3 | 4 | 4 | 4 | 4   |
| detailed documentation of the nursing rounds                                                                                                                                                                                                         | 4 | 4 | 4 | 4 | 4   |
| Documentation legible and complete in the patient record                                                                                                                                                                                             | 4 | 4 | 4 | 4 | 4   |
| <i>Electronic patient record in intensive care unit:**</i> Introduction of a PDMS* not before 2019, call for tender is pending                                                                                                                       | 4 | 4 | 4 | 4 | 4   |
| Epicrisis must be carried out promptly                                                                                                                                                                                                               | 4 | 4 | 4 | 4 | 4   |
| ABS* visits are immediately documented in the patient record                                                                                                                                                                                         | 4 | 2 | 4 | 4 | 4   |
| The existing records are modified. They should then also be incorporated into the PDMS.                                                                                                                                                              | 4 | 4 | 4 | 4 | 4   |
| Warning Scores were incorporated into the emergency sheets of the ED*                                                                                                                                                                                | 3 | 4 | 4 | 3 | 3,5 |
| ABS* Team has now been formed and started to work                                                                                                                                                                                                    | 2 | 2 | 2 | 2 | 2   |
| <i>Professional training by external speakers on the topic of sepsis**</i> Topic discussed with internal advisors                                                                                                                                    | ? | 3 | 2 | 4 | 3   |
| QM* workshops                                                                                                                                                                                                                                        | 4 | 4 | 4 | 4 | 4   |
| Responsibilities regulated                                                                                                                                                                                                                           | 2 | 2 | 2 | 4 | 2   |
| SOPs developed for <i>Sepsis, antibiotic treatment, microbiological diagnostics, Catecholamine therapy, medical imaging**</i> ; SOP* volume therapy must be revised and supplemented again                                                           | 2 | 2 | 2 | 2 | 2   |
| <i>missing intensive care records:**</i> transferred into existing PDMS*                                                                                                                                                                             | 3 | 4 | 4 | 4 | 4   |
| <i>electronic council:**</i> applied                                                                                                                                                                                                                 | 4 | 4 | 4 | 3 | 4   |
| Team meeting / joint review of relevant cases of the peer review**                                                                                                                                                                                   | 3 | 3 | 2 | 3 | 3   |
| Survey on corneal donation                                                                                                                                                                                                                           | 4 | 4 | 4 | 4 | 4   |
| added to PDMS system                                                                                                                                                                                                                                 | 1 | 4 | 2 | 4 | 3   |
| weekly ABS* visit                                                                                                                                                                                                                                    | 3 | 2 | 2 | 1 | 2   |
| Documentation form therapy limitation                                                                                                                                                                                                                | 2 | 4 | 4 | 4 | 4   |
| PDMS* adapted, RASS* score, record of therapy goal, weaning protocol                                                                                                                                                                                 | 4 | 4 | 4 | 3 | 4   |
| <i>Highlighting of daily therapy goals, not solely shift records**:</i> Is documented in the journal.                                                                                                                                                | 2 | 4 | 4 | 4 | 4   |
| <i>Documentation of nursery goals,**</i> Visible in the journal.                                                                                                                                                                                     | 3 | 4 | 4 | 4 | 4   |
| documentation is made, forms available.                                                                                                                                                                                                              | 3 | 4 | 4 | 4 | 4   |
| Daily joint rounds with treating departments.                                                                                                                                                                                                        | 2 | 3 | 3 | 1 | 2,5 |
| <i>modifying SOP Analgo sedation less benzodiazepine perfuser**,,</i> Implemented                                                                                                                                                                    | 3 | 4 | 2 | 4 | 3,5 |
| Weaning protocol available.                                                                                                                                                                                                                          | 2 | 4 | 2 | 2 | 2   |
| <i>Documentation of bronchoscopies:**</i> Documentation in the system.                                                                                                                                                                               | 3 | 4 | 4 | 4 | 4   |
| <i>Therapy limitation form:**</i> Available in the system.                                                                                                                                                                                           | 2 | 4 | 4 | 4 | 4   |
| Corresponding specifications and procedure protocols available at each workstation.                                                                                                                                                                  | 1 | 2 | 2 | 2 | 2   |
| General SOP's* for documentation, education etc. already available, use also at the intensive care unit                                                                                                                                              | 4 | 4 | 4 | 4 | 4   |

|                                                                                                                                  |   |   |   |   |     |
|----------------------------------------------------------------------------------------------------------------------------------|---|---|---|---|-----|
| written definition of daily goals                                                                                                | 3 | 3 | 3 | 4 | 3   |
| SOP pain. Yes. SOP sedation: yes. SOP delirium: no.                                                                              | 2 | 2 | 2 | 3 | 2   |
| Sepsis: no separate SOP, but S3* guideline is applied. Monitoring: no SOP                                                        | 2 | 2 | 2 | 2 | 2   |
| SOP Ventilation                                                                                                                  | 2 | 2 | 2 | 2 | 2   |
| SOP's ( <i>prevention of ventilator-associated pneumonia, early mobilization</i> )** were already in place, were re-examined     | 2 | 2 | 2 | 4 | 2   |
| <i>teleradiology</i> :** critical reflection of the status quo was made. since 1.1.2018 joint radiology department with RKU* Ulm | 3 | 4 | 4 | 3 | 3,5 |
| Plan for new building of interdisciplinary emergency department                                                                  | 3 | 4 | 4 | 4 | 4   |
| Introduction MTS*                                                                                                                | 2 | 3 | 2 | 2 | 2   |
| Planning PDMS* 2020                                                                                                              | 3 | 4 | 4 | 4 | 4   |
| New conception of ICU* documentation                                                                                             | 3 | 4 | 4 | 4 | 4   |
| Introduction of electronic consil                                                                                                | 3 | 4 | 3 | 4 | 3,5 |
| Introduction S3* guideline Delir                                                                                                 | 2 | 4 | 3 | 3 | 3   |
| Introduction of a complete nursing anamnesis                                                                                     | 3 | 4 | 3 | 4 | 3,5 |
| record once per shift ( <i>pain score</i> )**                                                                                    | 4 | 4 | 2 | 4 | 4   |
| Introduction and implementation of pressure ulcer - expert standard                                                              | 3 | 3 | 2 | 4 | 3   |
| Training for pressure ulcer standard carried out, digital recording implemented                                                  | 3 | 3 | 2 | 4 | 3   |
| SOPs ( <i>sepsis, emergency intubation</i> )** developed + implemented                                                           | 2 | 2 | 2 | 1 | 2   |
| see above: SOPs ( <i>sepsis, emergency intubation</i> )                                                                          | 2 | 2 | 2 | 3 | 2   |
| Introduction of sedation breaks Introduction of ABS visits Modification of PDMS with (daily goals, work diagnoses)               | 1 | 3 | 2 | 1 | 1,5 |
| Checklist introduced in PDMS* - working diagnosis/daily therapy goal                                                             | 3 | 3 | 3 | 2 | 3   |
| currently no weaning protocol, but daily sedation breaks                                                                         | 2 | 2 | 2 | 1 | 2   |
| Training ABS experts, internal PI* ABS                                                                                           | 2 | 2 | 2 | 1 | 2   |
| hire emergency department manager                                                                                                | 1 | 3 | 3 | 2 | 2,5 |
| Update PIs* ( <i>sepsis, volume management, ventilation, complex visceral surgery concepts</i> )**                               | 2 | 3 | 2 | 3 | 2,5 |
| PI* on End of Life Decision                                                                                                      | 4 | 4 | 3 | 4 | 4   |

**Notes:**

## \* Abbreviations

ABS antibiotic stewardship    HIS hospital information system    ICU intensive care unit    ED: emergency department    MTS Manchester-Triage-System    PDMS Patient data management system    PI process instruction  
 QM quality management    RKU Universitäts- und Rehabilitationskliniken Ulm    S3 highest standard of German medical guideline provided by the Association of the Scientific Medical Societies in Germany  
 SOP standard operating procedure

\*\**Italic entries*: In order to enable interpretation, the results of the protocols were briefly included in the measures by the authors.

Median Overall: 3
